# Supplementary material for: Who benefit from school doctors’ health checks: a prospective study of a screening method
Source: Springer Nature journal article supplement (doi:10.1186/s12913-018-3295-3), 2018-06-26
Supplement: MOESM2 [file 15888978]

**FORM FOR IDENTIFYING CONCERNS**  
**To be filled in by parents**

**patient number**

*For research purposes 2017-2018*

|    | <b>Are you concerned about the child's</b><br>(Please check the most suitable option)                     | <b>Not at all</b> | <b>Only a little</b> | <b>Quite a lot</b> | <b>A great deal</b> | <b>I don't know</b> |
|----|-----------------------------------------------------------------------------------------------------------|-------------------|----------------------|--------------------|---------------------|---------------------|
| 1  | growth or some physical symptom (recurrent pain, prolonged complaints, skin symptoms, undescended testes) |                   |                      |                    |                     |                     |
| 2  | school absenteeism                                                                                        |                   |                      |                    |                     |                     |
| 3  | learning                                                                                                  |                   |                      |                    |                     |                     |
| 4  | concentration                                                                                             |                   |                      |                    |                     |                     |
| 5  | behavior                                                                                                  |                   |                      |                    |                     |                     |
| 6  | emotions                                                                                                  |                   |                      |                    |                     |                     |
| 7  | ability to get on with others                                                                             |                   |                      |                    |                     |                     |
| 8  | eating                                                                                                    |                   |                      |                    |                     |                     |
| 9  | sleeping                                                                                                  |                   |                      |                    |                     |                     |
| 10 | the well-being of a family member or the whole family                                                     |                   |                      |                    |                     |                     |

**Do you wish to speak with the school doctor about these concerns or some other concern related to the child's well-being?**

| <b>Yes</b> | <b>No</b> | <b>I don't know</b> |
|------------|-----------|---------------------|
|            |           |                     |

**Please describe your concern in your own words (if you wish, you can continue on the other side of the page)**

---



---



---

Child's name and class \_\_\_\_\_

Parent's name \_\_\_\_\_

Date \_\_\_\_\_ Parent's signature \_\_\_\_\_

---
