# Supplementary material for: Who benefit from school doctors’ health checks: a prospective study of a screening method
Source: Springer Nature journal article supplement (doi:10.1186/s12913-018-3295-3), 2018-06-26
Supplement: MOESM3 [file 15888978]

**FORM FOR IDENTIFYING CONCERNS**  
*To be filled in by school nurse*

**patient number**

*For research purposes 2017-2018*

|    | <b>Are you concerned about the student's</b><br>(Please check the most suitable option) | <b>Not at all</b> | <b>Only a little</b> | <b>Quite a lot</b> | <b>A great deal</b> | <b>I don't know</b> |
|----|-----------------------------------------------------------------------------------------|-------------------|----------------------|--------------------|---------------------|---------------------|
| 1  | growth                                                                                  |                   |                      |                    |                     |                     |
| 2  | hearing                                                                                 |                   |                      |                    |                     |                     |
| 3  | some physical symptom                                                                   |                   |                      |                    |                     |                     |
| 4  | concentration                                                                           |                   |                      |                    |                     |                     |
| 5  | behavior                                                                                |                   |                      |                    |                     |                     |
| 6  | emotions                                                                                |                   |                      |                    |                     |                     |
| 7  | ability to get on with others                                                           |                   |                      |                    |                     |                     |
| 8  | eating                                                                                  |                   |                      |                    |                     |                     |
| 9  | sleeping                                                                                |                   |                      |                    |                     |                     |
| 10 | the well-being of a family member or the whole family                                   |                   |                      |                    |                     |                     |

**Do you wish the school doctor to address these concerns or some other concern related to the well-being of the student?**

| <b>Yes</b> | <b>No</b> | <b>I don't know</b> |
|------------|-----------|---------------------|
|            |           |                     |

**Please describe your concern in your own words (if you wish, you can continue on the other side of the page)**

---



---

Student's name and class

---

School nurse's name

---

Date

School nurse's signature

---



---
