# Supplementary material for: Who benefit from school doctors’ health checks: a prospective study of a screening method
Source: Springer Nature journal article supplement (doi:10.1186/s12913-018-3295-3), 2018-06-26
Supplement: MOESM5 [file 15888978]

**FEEDBACK FORM**  
To be filled in by the parent

**patient number**  
*For research purposes 2017-2018*

**How beneficial or harmful do you think the school doctor's examination was?**

(Please check the part that you think best describes the benefit or harm)

| A great deal of benefit | Quite a lot of benefit | Only a little benefit | No benefit or harm | Only a little harm | Quite a lot of harm | A great deal of harm | I don't know |
|-------------------------|------------------------|-----------------------|--------------------|--------------------|---------------------|----------------------|--------------|
|                         |                        |                       |                    |                    |                     |                      |              |

**Please explain your answer**

---

---

---

Student's name

Student's date of birth

---

Parent's name

---

Date

---

Parent's signature

---
