# Supplementary material for: Who benefit from school doctors’ health checks: a prospective study of a screening method
Source: Springer Nature journal article supplement (doi:10.1186/s12913-018-3295-3), 2018-06-26
Supplement: MOESM6 [file 15888978]

**FEEDBACK FORM**  
*To be filled in by the student*

*patient number*  
*For research purposes 2017-2018*

**How beneficial or harmful do you think the physician's examination was?**

Please put a cross (x) in the box under the picture

| <b>Quite a lot of benefit</b>                                                     | <b>Only a little benefit</b>                                                      | <b>No benefit or harm</b>                                                         | <b>Only a little harm</b>                                                          | <b>Quite a lot of harm</b>                                                          |
|-----------------------------------------------------------------------------------|-----------------------------------------------------------------------------------|-----------------------------------------------------------------------------------|------------------------------------------------------------------------------------|-------------------------------------------------------------------------------------|
|  |  |  |  |  |
|                                                                                   |                                                                                   |                                                                                   |                                                                                    |                                                                                     |

**Please explain your answer:**

---

---

---

Student's name

---

Student's date of birth

---

Date

---
